# Supplementary material
Source: publisher figshare collection journal article supplement (https://acs.figshare.com/ndownloader/files/21661593)
Supplement: Supplementary file 1 [file 21661593]

## Supporting Information

### Surface Changes of $\text{LiNi}_x\text{Mn}_y\text{Co}_{1-x-y}\text{O}_2$ in Li-Ion Batteries using In Situ Surface-Enhanced Raman Spectroscopy

*Chao-Yu Li<sup>1,2,\*</sup>, Yang Yu<sup>3</sup>, Chen Wang<sup>2</sup>, Yirui Zhang<sup>4</sup>, Shi-Yao Zheng<sup>2</sup>, Jian-Feng Li<sup>2</sup>, Filippo Maglia<sup>5</sup>, Roland Jung<sup>5</sup>, Zhong-Qun Tian<sup>2,\*</sup>, Yang Shao-Horn<sup>1,3,4</sup>*

<sup>1</sup>Research Laboratory of Electronics, MIT, Cambridge, Massachusetts 02139, USA

<sup>2</sup>State Key Laboratory for Physical Chemistry of Solid Surfaces, College of Chemistry and Chemical Engineering, Collaborative Innovation Center of Chemistry for Energy Materials (iChEM), Xiamen University, Xiamen, China

<sup>3</sup>Department of Materials Science and Engineering, MIT, Cambridge, Massachusetts 02139, USA

<sup>4</sup>Department of Mechanical Engineering, MIT, Cambridge, Massachusetts 02139, USA

<sup>5</sup>BMW Group, Petuelring 130, 80788 München, Germany

#### Corresponding Authors

\* Zhong-Qun Tian (zqtian@xmu.edu.cn)

\* Chao-Yu Li (li\_chaoyu@outlook.com)

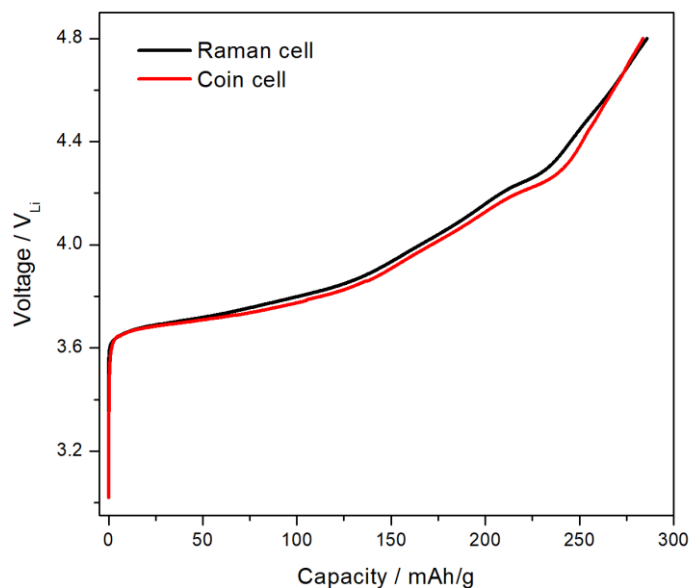

**Figure S1.** First charge curves of NMC811 composite electrode using an electrochemical Raman cell (black) and a coin cell (red). In the coin cell, a NMC811 electrode is fully covered by Li counter electrode. Both the composite electrodes were charged to 4.8 V<sub>Li</sub> at a current of ~27.5 mA/g<sub>NMC</sub>.

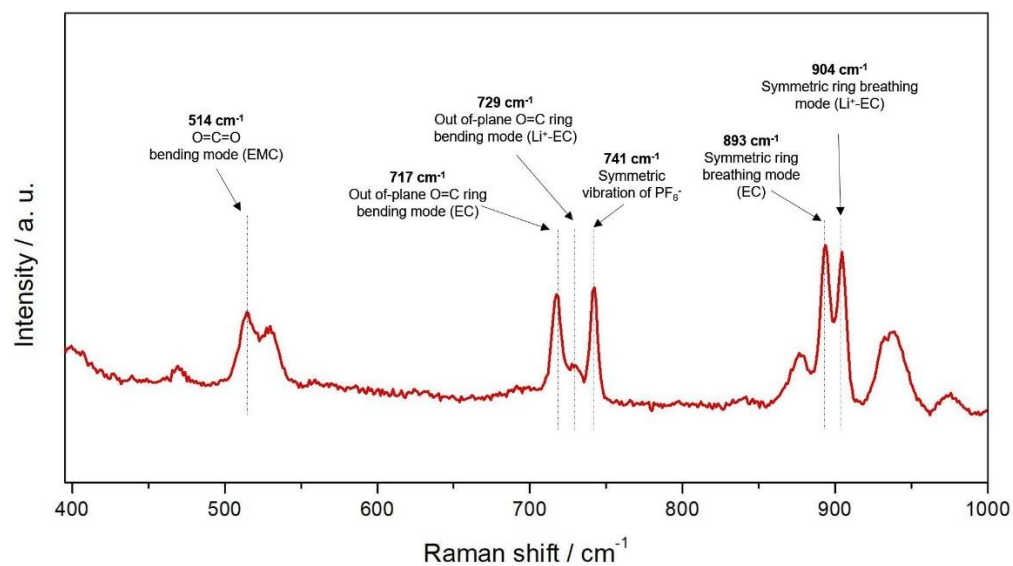

**Figure S2.** Raman spectrum of LP57 electrolyte [1 M LiPF<sub>6</sub> in a 3:7 EC/EMC electrolyte] and corresponding Raman peak assignments based on literature data<sup>1-3</sup>.

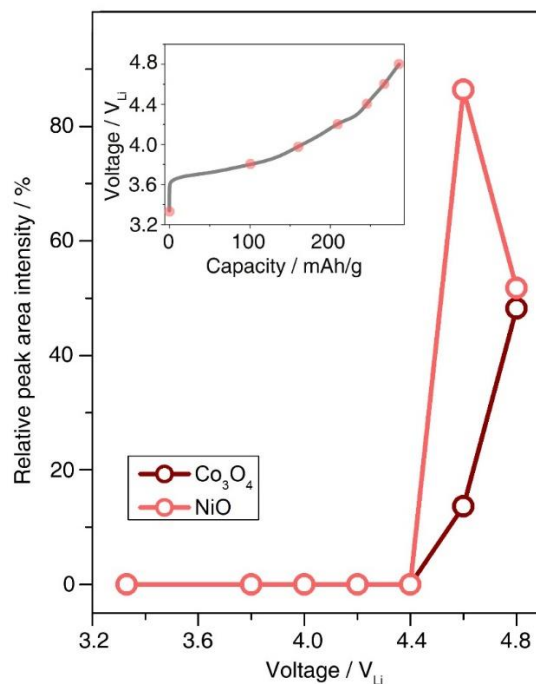

**Figure S3.** Potential-dependent relative Raman peak area intensities of  $Co_3O_4$  and NiO species on NMC811 composite electrode surface. The inset presents electrochemical profile of NMC811 composite electrode charged to 4.8  $V_{Li}$  at a current of  $\sim 27.5$  mA/g<sub>NMC</sub>, where the light red spots denote the voltages for Raman acquisitions.

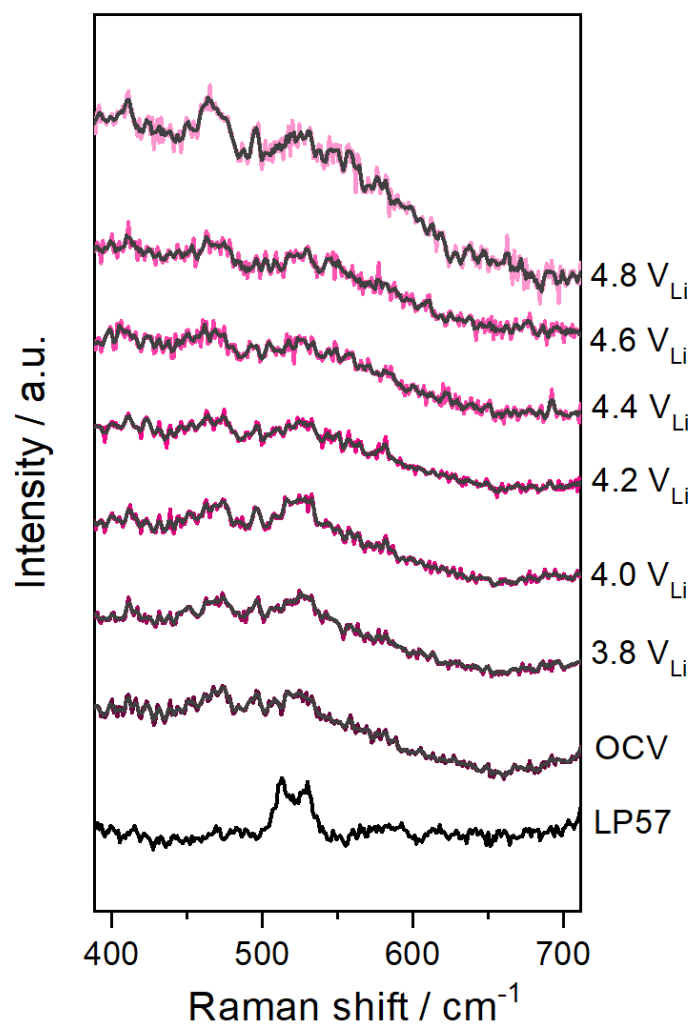

**Figure S4.** *In situ* electrochemical normal Raman spectra of an NMC811 composite electrode as a function of voltage in presence of LP57 electrolyte (1 M LiPF<sub>6</sub> in 30%EC and 70%EMC). The black curves represent the smoothed results.

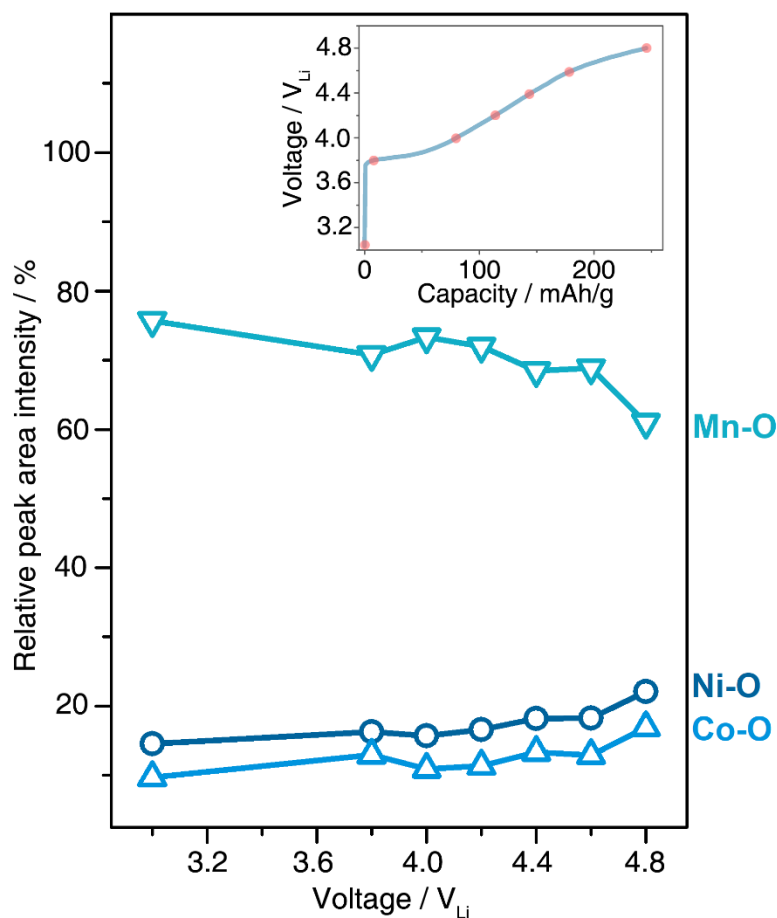

**Figure S5.** Potential-dependent relative Raman peak area intensities of E<sub>g</sub> modes of Ni-O, Co-O and Mn-O bonds on NMC111 composite electrode surface. The inset shows electrochemical profiles of NMC111 composite electrodes charged to 4.8 V<sub>Li</sub> at a current of 27.5 mA/g<sub>NMC</sub> (C/10 rate), where the light red dots denote the voltages of Raman acquisitions.

## References

1. Katon, J. E.; Cohen, M. D., The Vibrational Spectra and Structure of Dimethyl Carbonate and its Conformational Behavior. *Can. J. Chem.* **1975**, 53, 1378-1386.
2. Hyodo, S.-A.; Okabayashi, K., Raman Intensity Study of Local Structure in Non-Aqueous Electrolyte Solutions—I. Cation-Solvent Interaction in LiClO<sub>4</sub>/Ethylene Carbonate. *Electrochim. Acta* **1989**, 34, 1551-1556.
3. Klassen, B.; Aroca, R.; Nazri, M.; Nazri, G. A., Raman Spectra and Transport Properties of Lithium Perchlorate in Ethylene Carbonate Based Binary Solvent Systems for Lithium Batteries. *J. Phys. Chem. B* **1998**, 102, 4795-4801.
